# Supplementary material for: Electroanalytical properties of cytochrome c with direct electron transfer on graphene/gold nanoparticles chitosan modified glass carbon electrode
Source: Royal Society of Chemistry journal article supplement (doi:10.1039/c2ay25763g), 2012-01-01
Supplement: c2ay25763g.pdf [file c2ay25763g.pdf]

## **Electronic Supplementary Information**

### **Electroanalytical Properties of Cytochrome c with Direct Electron Transfer on Graphene/Gold Nanoparticles Chitosan Modified Glass Carbon Electrode**

Fucheng Li <sup>a</sup>, Yan Mo <sup>a</sup>, Dan Xiao <sup>a, b</sup>, Hongyan Yuan <sup>b\*</sup>, Yong Guo <sup>a\*</sup>

<sup>a</sup>*Key laboratory of Green Chemistry and Technology, Ministry of Education, College of Chemistry and*

<sup>b</sup>*College of Chemical Engineering, Sichuan University, Chengdu, 610064 People's Republic of China*

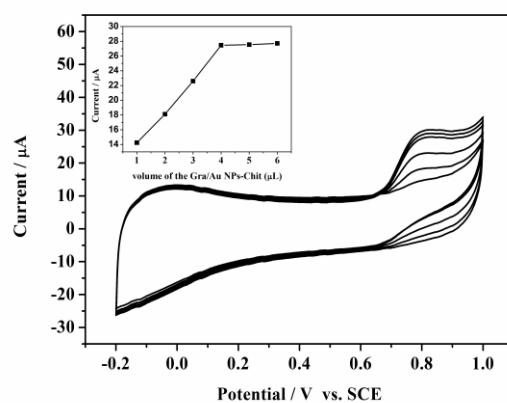

Figure S1 CVs of Cyt c-Gra/Au NPs-Chit/GCE in presence of 200  $\mu\text{M}$  nitrite with various volume of Gra/Au NPs-Chit: 1, 2, 3, 4, 5 and 6  $\mu\text{L}$ . Inset: the plot of peak current ( $I_p$ ) versus volume of Gra/Au NPs-Chit.

With the increasing volume of Gra/Au NPs-Chit dispersion, the catalytic peak current increased and then tended toward a constant value. However, the layer of Gra/Au NPs-Chit will drop from the electrode if it's too thick. So, 4  $\mu\text{L}$  of 5 mg/mL Gra/Au NPs-Chit dispersion was used for preparation of the nitrite biosensor.

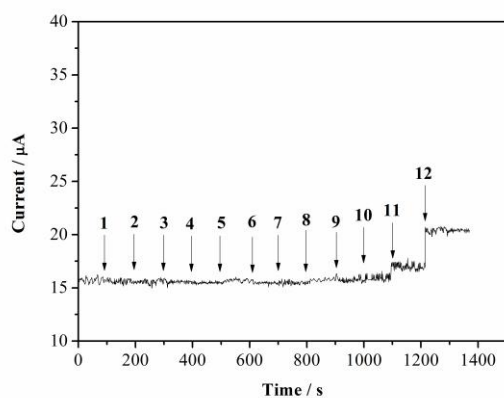

Figure S2 Effect of interference (10mM) on the response of the nitrite sensor: (1) NaCl, (2)NaF, (3)KBr, (4) $\text{NH}_4\text{NO}_3$ , (5) $\text{K}_2\text{SO}_4$ , (6) $\text{Na}_2\text{HPO}_4$ , (7) $\text{NaH}_2\text{PO}_4$ , (8) $\text{CaCl}_2$ , (9)glucose, (10)fructose, (11)L-ascorbic acid, (12)200  $\mu\text{M}$  nitrite.
